# Supplementary material for: Neuropeptide Substance P Enhances Skin Wound Healing In Vitro and In Vivo under Hypoxia
Source: MDPI journal article supplement (doi:10.3390/biomedicines9020222), 2021-02-22
Supplement: s1 [file s1]

# Supplementary Figure

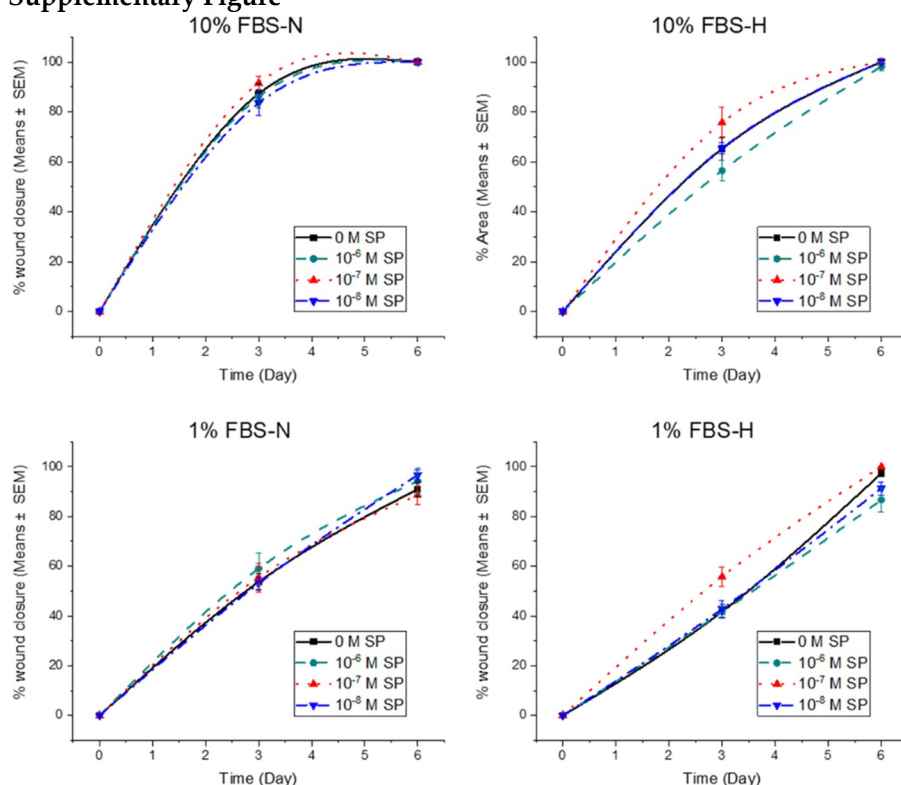

**Figure S1.** Effect of different concentrations of SP on in vitro wound closure under normoxia (left column, N) or hypoxia (right column, H), and regular serum condition (upper row) or deficient serum conditions (lower row). Quantified wound healing images showing the fraction (%) of wound closure over 6 days in various culture environments (n=6-15).
